# Supplementary material for: Transcriptome-resolved diel metabolism of a coastal Phaeocystis bloom links cellular physiology to carbon cycling
Source: Research Square preprint supplement (doi:10.21203/rs.3.rs-6767494/v1), 2025-06-03
Supplement: Supplementary file 2 [file 976fb972d1899a581bf2beb2.xlsx]

## Sheet: phaeocystis_O2_clusters_KEGGMWU
phaeocystis_O2_clusters_KEGG_MWU_results
annotation	p_val	q_val	U	size	estimate	direction	Cluster
ko:K06655	9.5032	51.3732	2356438.5	27	0.930382917937019	top	1
ko:K08820	9.5032	51.3732	2356438.5	27	0.930382917937019	top	1
ko:K15594	9.5032	51.3732	2356438.5	27	0.930382917937019	top	1
ko:K15596	9.5032	51.3732	2356438.5	27	0.930382917937019	top	1
ko:K02134	1.11753e+07	3.33014e+08	1369200.0	16	0.9122550796324329	top	1
ko:K02733	7.62734e+07	2.06649e+08	2324520.0	32	0.7743774385433767	top	1
ko:K02739	7.62734e+07	2.06649e+08	2324520.0	32	0.7743774385433767	top	1
ko:K15402	7.62734e+07	2.06649e+08	2324520.0	32	0.7743774385433767	top	1
ko:K02898	4.06776e+09	1.00491e+10	833683.5	9	0.9874794789245891	top	1
ko:K04563	9.09882e+07	2.15511e+09	2945936.0	44	0.7137399623594537	top	1
ko:K02114	1.09479e+10	2.564e+10	2130091.5	30	0.7569137368611816	top	1
ko:K02112	3.55661e+10	7.80824e+09	2326818.0	34	0.7295463353027714	top	1
ko:K13046	2.65948e+10	5.2179e+11	560073.0	6	0.9950909323497431	top	1
ko:K18399	2.65948e+10	5.2179e+11	560073.0	6	0.9950909323497431	top	1
ko:K12839	3.45337e+10	6.67855e+10	556125.0	6	0.9880764556638169	top	1
ko:K01894	3.89646e+10	7.4913e+10	554283.0	6	0.9848037438969789	top	1
ko:K15306	4.73887e+10	8.97573e+10	686828.0	8	0.9152239728801995	top	1
ko:K20282	4.73887e+10	8.97573e+10	686828.0	8	0.9152239728801995	top	1
ko:K18624	4.95035e+10	9.36084e+10	2515610.0	39	0.6876193475131709	top	1
ko:K00688	7.70101e+10	0.00014182830616419316	933726.0	12	0.8294831887086114	top	1
ko:K20720	7.70101e+10	0.00014182830616419316	933726.0	12	0.8294831887086114	top	1
ko:K20721	7.70101e+10	0.00014182830616419316	933726.0	12	0.8294831887086114	top	1
ko:K20722	7.70101e+10	0.00014182830616419316	933726.0	12	0.8294831887086114	top	1
ko:K20723	7.70101e+10	0.00014182830616419316	933726.0	12	0.8294831887086114	top	1
ko:K00793	0.0001163426347039929	0.00020696647559614685	1521401.0	22	0.7372086104203452	top	1
ko:K01610	0.0001242144416579358	0.00021977872907902	535983.0	6	0.9522898322068951	top	1
ko:K05862	0.0001383798260202879	0.00024287826606693005	465287.5	5	0.992020766262286	top	1
ko:K13947	0.0001383798260202879	0.00024287826606693005	465287.5	5	0.992020766262286	top	1
ko:K15041	0.0001383798260202879	0.00024287826606693005	465287.5	5	0.992020766262286	top	1
ko:K14009	0.00035851307135865377	0.0005979555582188798	1018277.5	14	0.7753673234426065	top	1
ko:K14307	0.0005305424676067231	0.0008611242100504744	576572.5	7	0.878062170863271	top	1
ko:K15040	0.0006352773050203053	0.0010195945569571438	508019.0	6	0.9026057323980697	top	1
ko:K00869	0.0008787018251459296	0.0013818052315350945	993741.0	14	0.7566840074195681	top	1
ko:K12622	0.0008787018251459296	0.0013818052315350945	993741.0	14	0.7566840074195681	top	1
ko:K15731	0.0008787018251459296	0.0013818052315350945	993741.0	14	0.7566840074195681	top	1
ko:K21956	0.0008787018251459296	0.0013818052315350945	993741.0	14	0.7566840074195681	top	1
ko:K22075	0.0008787018251459296	0.0013818052315350945	993741.0	14	0.7566840074195681	top	1
ko:K17794	0.0009308933154796121	0.001459384095745076	501023.0	6	0.8901758238634344	top	1
ko:K02976	0.0011511528858821627	0.001774420500043119	1044504.0	15	0.742314990512334	top	1
ko:K18739	0.0011511528858821627	0.001774420500043119	1044504.0	15	0.742314990512334	top	1
ko:K03265	0.0012557173112308256	0.0019252656139825304	805679.0	11	0.7807980881238455	top	1
ko:K00820	0.0013926496917961602	0.0021217590629321473	1381634.5	21	0.7013636552845133	top	1
ko:K03941	0.0014393546316442815	0.002185669045738755	492799.0	6	0.8755641074842405	top	1
ko:K02956	0.002505486196768537	0.0036583123845412863	1636906.0	26	0.6711502790538246	top	1
ko:K05061	0.002505486196768537	0.0036583123845412863	1636906.0	26	0.6711502790538246	top	1
ko:K02937	0.002575226384698862	0.003755368212532933	481371.0	6	0.8552597914845532	top	1
ko:K19933	0.002575226384698862	0.003755368212532933	481371.0	6	0.8552597914845532	top	1
ko:K06698	0.0026228660774965	0.0038163615028804355	726697.0	10	0.7746807240475023	top	1
ko:K15110	0.002945468217542166	0.004261469288289122	841776.0	12	0.7477986482740976	top	1
ko:K02875	0.003262113505756738	0.004697402556863745	780169.0	11	0.7560758858223839	top	1
ko:K03246	0.0034333769455228403	0.004933197956434475	837333.0	12	0.7438516726008997	top	1
ko:K19401	0.003463636700207355	0.004975120549375679	599136.0	8	0.7983711063258214	top	1
ko:K02945	0.004821736405274185	0.00681090648085917	999192.0	15	0.7101123595505618	top	1
ko:K20302	0.004846526135668402	0.006843819174368872	591000.0	8	0.7875295823294886	top	1
ko:K02838	0.00493931469043903	0.006969613643531637	1111230.0	17	0.6968261154748662	top	1
ko:K01867	0.004970052524044459	0.007005334769320333	1607393.0	26	0.6590496097510574	top	1
ko:K04551	0.005344949885870525	0.007513014599441745	2878660.0	50	0.6137475214805023	top	1
ko:K12601	0.006828941023802279	0.009418690625565308	460855.0	6	0.8188086760619434	top	1
ko:K02989	0.007384093414990578	0.010134381493990952	1040659.0	16	0.6933585005223546	top	1
ko:K01698	0.007691801078099509	0.010540956144905233	2699375.5	47	0.6122585045369778	top	1
ko:K00088	0.009216505271645277	0.012485212772172774	454145.0	6	0.8068869084422461	top	1
ko:K04083	0.009377467145657823	0.012695775348938627	453751.0	6	0.8061868821468421	top	1
ko:K06118	0.0097871088926032	0.013207566919680384	513408.5	7	0.781869725055662	top	1
ko:K12873	0.010707395688484835	0.014369299996667003	629467.5	9	0.745590189682252	top	1
ko:K17285	0.010707395688484835	0.014369299996667003	629467.5	9	0.745590189682252	top	1
ko:K12621	0.011084216546853199	0.014848972312766896	969962.5	15	0.6893393457419212	top	1
ko:K13346	0.011157705421044616	0.014934359571715704	969720.0	15	0.689167004242799	top	1
ko:K08907	0.011400585812525461	0.015237257652284612	1461374.5	24	0.6491120415183108	top	1
ko:K20068	0.011767973808737538	0.015710005709223995	855706.5	13	0.7016990056401181	top	1
ko:K02881	0.0126667492672647	0.01684135210737306	566178.5	8	0.7544540061403322	top	1
ko:K01710	0.013113251762530153	0.0173947436053193	1880965.0	32	0.6266140358825661	top	1
ko:K00794	0.015443671875768328	0.02024641148906005	790032.0	12	0.7018314393535595	top	1
ko:K02155	0.01820633462421598	0.023759757909194098	1967634.0	34	0.6169284292613918	top	1
ko:K02717	0.018850362302770558	0.024565347357127256	783153.0	12	0.695720423000661	top	1
ko:K02967	0.019537998561970745	0.02541820594344722	554084.0	8	0.738337632987229	top	1
ko:K12733	0.021385729198800947	0.02768876462904772	666092.0	10	0.7100739824744686	top	1
ko:K07877	0.02205330574227726	0.028504905734392124	608128.5	9	0.720314620955305	top	1
ko:K03242	0.022640176078758775	0.0292059542621832	1214140.0	20	0.6471547662196449	top	1
ko:K00601	0.022864509130014445	0.02947052439057963	3444185.5	63	0.5827943959993083	top	1
ko:K02953	0.022990627745774584	0.02962477131010494	491221.0	7	0.7480803847454168	top	1
ko:K09698	0.024518153814371297	0.031443180791804665	1102654.5	18	0.6530348094293897	top	1
ko:K00855	0.025683092405382676	0.032845479989628	1208268.0	20	0.6440249024582649	top	1
ko:K12863	0.02584208909162536	0.03302124565517756	369463.5	5	0.7877182696202801	top	1
ko:K08910	0.0279326120890831	0.035534427616095474	367626.0	5	0.7838006097690979	top	1
ko:K03347	0.027955475582673667	0.03554383240243097	988543.0	16	0.6586352418821824	top	1
ko:K03943	0.027955475582673667	0.03554383240243097	988543.0	16	0.6586352418821824	top	1
ko:K19720	0.030643503094475978	0.03868321338437283	2554654.5	46	0.5920300129128664	top	1
ko:K11659	0.03107792965027829	0.03921007324080965	540371.0	8	0.720064548109929	top	1
ko:K12275	0.032474050226446394	0.040848141470167305	763457.0	12	0.6782233190485328	top	1
ko:K10886	0.03252105250632365	0.040884879963490335	1409334.0	24	0.6259967379485321	top	1
ko:K19347	0.03456385016067052	0.04327544727201118	925217.5	15	0.6575396740791278	top	1
ko:K20537	0.03642329941917005	0.045491998051396136	478222.5	7	0.72828497111059	top	1
ko:K01311	0.03731273489815669	0.04653963541178881	360607.5	5	0.768836748182419	top	1
ko:K09632	0.03731273489815669	0.04653963541178881	360607.5	5	0.768836748182419	top	1
ko:K20751	0.03731273489815669	0.04653963541178881	360607.5	5	0.768836748182419	top	1
ko:K15498	0.04071057775112711	0.05051717655048044	1606570.0	28	0.6116613009828795	top	1
ko:K02639	0.045526422915594236	0.056144367497894664	1858937.5	33	0.600509982239296	top	1
ko:K09499	0.04633085529093767	0.057090447857832814	1019823.5	17	0.6395072559011026	top	1
ko:K01933	0.046697322833133145	0.057526594750200215	3834228.5	72	0.5676947488552023	top	1
ko:K07825	0.04710475234794793	0.05801295551831164	2011146.5	36	0.5955395236504654	top	1
ko:K07878	0.047442251822117226	0.05838166768147527	527063.0	8	0.7023311408651899	top	1
ko:K02636	0.047946587348718275	0.05895492878441543	857057.5	14	0.6526063669396719	top	1
ko:K14573	0.049521651758132126	0.06071291084007928	1438542.5	25	0.6134117220646867	top	1
ko:K03250	0.0513747557028541	0.0628339106879464	467917.0	7	0.7125907267582641	top	1
ko:K15427	0.05201849180515818	0.06357047070337815	1383466.0	24	0.6145067124348833	top	1
ko:K00390	0.05289055149882817	0.06449896075825781	744440.0	12	0.6613294103433327	top	1
ko:K00052	0.05576960765156768	0.06788380057190821	408303.0	6	0.7254386713003432	top	1
ko:K05282	0.058934714067799564	0.07139599555537543	1790264.0	32	0.5963984180116411	top	1
ko:K12606	0.062143132000961956	0.0750848518391849	1163976.0	20	0.6204166044815896	top	1
ko:K15029	0.0630467144160409	0.07611656666886704	347076.0	5	0.7399867812293457	top	1
ko:K07891	0.06597786134255684	0.07936342221702845	345847.5	5	0.7373675457859838	top	1
ko:K09557	0.06597786134255684	0.07936342221702845	345847.5	5	0.7373675457859838	top	1
ko:K02978	0.0674750873253054	0.08107950477504662	570679.5	9	0.6759571171708988	top	1
ko:K08053	0.0674750873253054	0.08107950477504662	570679.5	9	0.6759571171708988	top	1
ko:K01784	0.0682789903060727	0.08201792958829879	1677547.0	30	0.5961050821198359	top	1
ko:K11787	0.07016173064236848	0.084197741525642	3444185.5	65	0.5648622607377911	top	1
ko:K01624	0.07355496146152309	0.08815468125083427	3089514.5	58	0.5678473805439987	top	1
ko:K00588	0.07455262660707704	0.08911792904774167	1671620.0	30	0.5939989623975723	top	1
ko:K13067	0.07455262660707704	0.08911792904774167	1671620.0	30	0.5939989623975723	top	1
ko:K13272	0.07455262660707704	0.08911792904774167	1671620.0	30	0.5939989623975723	top	1
ko:K18883	0.07455262660707704	0.08911792904774167	1671620.0	30	0.5939989623975723	top	1
ko:K21311	0.07455262660707704	0.08911792904774167	1671620.0	30	0.5939989623975723	top	1
ko:K16072	0.0746694014173753	0.08920193889737789	511756.0	8	0.6819339914291197	top	1
ko:K19878	0.0746694014173753	0.08920193889737789	511756.0	8	0.6819339914291197	top	1
ko:K08819	0.07468114449145	0.08920193889737789	1101570.5	19	0.6180563581950206	top	1
ko:K12581	0.07483861261802727	0.08936679443342913	566857.5	9	0.6714300435650883	top	1
ko:K10256	0.07715710418689496	0.09184893620175708	2381282.0	44	0.5769358618270202	top	1
ko:K21704	0.07715710418689496	0.09184893620175708	2381282.0	44	0.5769358618270202	top	1
ko:K21710	0.07715710418689496	0.09184893620175708	2381282.0	44	0.5769358618270202	top	1
ko:K21736	0.07715710418689496	0.09184893620175708	2381282.0	44	0.5769358618270202	top	1
ko:K15542	0.07736282200971475	0.09204613338545813	1617788.5	29	0.594693413479176	top	1
ko:K02719	0.08201952127438421	0.09733463333052568	885953.5	15	0.6296352756397956	top	1
ko:K01119	19124.7	167501	511641.0	26	0.8988489471520578	top	2
ko:K01447	19124.7	167501	511641.0	26	0.8988489471520578	top	2
ko:K02040	19124.7	167501	511641.0	26	0.8988489471520578	top	2
ko:K02656	19124.7	167501	511641.0	26	0.8988489471520578	top	2
ko:K02666	19124.7	167501	511641.0	26	0.8988489471520578	top	2
ko:K07261	19124.7	167501	511641.0	26	0.8988489471520578	top	2
ko:K07273	19124.7	167501	511641.0	26	0.8988489471520578	top	2
ko:K08307	19124.7	167501	511641.0	26	0.8988489471520578	top	2
ko:K09693	19124.7	167501	511641.0	26	0.8988489471520578	top	2
ko:K12204	19124.7	167501	511641.0	26	0.8988489471520578	top	2
ko:K14196	19124.7	167501	511641.0	26	0.8988489471520578	top	2
ko:K19223	19124.7	167501	511641.0	26	0.8988489471520578	top	2
ko:K07903	39434.4	3.01648e+06	325957.5	15	0.992577536198785	top	2
ko:K07907	39434.4	3.01648e+06	325957.5	15	0.992577536198785	top	2
ko:K07908	39434.4	3.01648e+06	325957.5	15	0.992577536198785	top	2
ko:K07928	39434.4	3.01648e+06	325957.5	15	0.992577536198785	top	2
ko:K17199	39434.4	3.01648e+06	325957.5	15	0.992577536198785	top	2
ko:K20869	39434.4	3.01648e+06	325957.5	15	0.992577536198785	top	2
ko:K11751	878356	56541.1	511641.0	28	0.8346454509269108	top	2
ko:K19788	808031	3.85368e+08	325957.5	17	0.8758037084106927	top	2
ko:K07915	1.31941e+11	4.26996e+11	328062.0	19	0.7886731399365815	top	2
ko:K06109	1.86472e+11	5.83437e+10	325957.5	19	0.7836138443674618	top	2
ko:K07902	1.86472e+11	5.83437e+10	325957.5	19	0.7836138443674618	top	2
ko:K00162	9.69871e+10	0.0002605491059900989	126033.0	6	0.9594619284702873	top	2
ko:K09189	9.69871e+10	0.0002605491059900989	126033.0	6	0.9594619284702873	top	2
ko:K00877	0.0002522315417076059	0.0006098114863540684	106462.5	5	0.9725711414607409	top	2
ko:K08267	0.0002522315417076059	0.0006098114863540684	106462.5	5	0.9725711414607409	top	2
ko:K07874	0.0002850187090047888	0.0006796599983960348	375125.5	24	0.7139372935032506	top	2
ko:K18158	0.00032283069811187877	0.0007590709827860143	426848.5	28	0.6963225362314112	top	2
ko:K06712	0.0003665670058526686	0.0008475288182422838	105092.5	5	0.9600557255743845	top	2
ko:K12000	0.0003665670058526686	0.0008475288182422838	105092.5	5	0.9600557255743845	top	2
ko:K12002	0.0003665670058526686	0.0008475288182422838	105092.5	5	0.9600557255743845	top	2
ko:K12009	0.0003665670058526686	0.0008475288182422838	105092.5	5	0.9600557255743845	top	2
ko:K07432	0.0005048874584118511	0.0011275022294012524	103892.5	5	0.9490933174987439	top	2
ko:K07441	0.0005048874584118511	0.0011275022294012524	103892.5	5	0.9490933174987439	top	2
ko:K00227	0.0017414645364935118	0.003388018536728913	114159.0	6	0.8690677385465674	top	2
ko:K12041	0.002973014607117792	0.005419512170132984	154852.5	9	0.7859056928394159	top	2
ko:K02912	0.004229770922675083	0.007459087046274323	138716.0	8	0.7920111451148769	top	2
ko:K04805	0.004229770922675083	0.007459087046274323	138716.0	8	0.7920111451148769	top	2
ko:K06990	0.004229770922675083	0.007459087046274323	138716.0	8	0.7920111451148769	top	2
ko:K09329	0.004229770922675083	0.007459087046274323	138716.0	8	0.7920111451148769	top	2
ko:K05193	0.005181448545676371	0.008943218149167423	94244.5	5	0.8609555565705933	top	2
ko:K05195	0.005181448545676371	0.008943218149167423	94244.5	5	0.8609555565705933	top	2
ko:K14153	0.008437990998330676	0.013776789183691665	106462.5	6	0.8104759512172841	top	2
ko:K04344	0.00873309396104997	0.014209371113421082	91796.5	5	0.8385922440962865	top	2
ko:K15119	0.01644187640717514	0.025121310515761754	130464.0	8	0.7448956287397799	top	2
ko:K01597	0.017605517054074565	0.026777661833053374	143536.5	9	0.7284748549764765	top	2
ko:K07025	0.02320862235201403	0.03426034728154453	86816.5	5	0.7930982505823779	top	2
ko:K17593	0.026502496215063304	0.03871040364704845	205737.0	14	0.6712419494815695	top	2
ko:K08752	0.03487562429550401	0.049768001720295246	84552.5	5	0.7724158406796693	top	2
ko:K08753	0.03487562429550401	0.049768001720295246	84552.5	5	0.7724158406796693	top	2
ko:K08754	0.03487562429550401	0.049768001720295246	84552.5	5	0.7724158406796693	top	2
ko:K08756	0.03487562429550401	0.049768001720295246	84552.5	5	0.7724158406796693	top	2
ko:K17289	0.03487562429550401	0.049768001720295246	84552.5	5	0.7724158406796693	top	2
ko:K14806	0.036495895149753044	0.051922903969093104	138180.0	9	0.701289605505565	top	2
ko:K02209	0.045074982571151785	0.06235163650663302	83056.5	5	0.7587493719453706	top	2
ko:K03254	0.04588493703125635	0.06336747458712777	123267.5	8	0.7038065820125154	top	2
ko:K00605	0.05015831663938631	0.06854582018700356	96005.0	6	0.730865268959637	top	2
ko:K05359	0.05015831663938631	0.06854582018700356	96005.0	6	0.730865268959637	top	2
ko:K21868	0.050465919966500065	0.06882749279991257	199521.0	14	0.6509614945416343	top	2
ko:K05287	0.052658428155607305	0.07134172325164509	109032.5	7	0.711463546730527	top	2
ko:K04976	0.054524450109467305	0.07353154233423295	134980.5	9	0.6850515385435223	top	2
ko:K04981	0.054524450109467305	0.07353154233423295	134980.5	9	0.6850515385435223	top	2
ko:K04856	0.055973790505344546	0.07518486341538869	121744.0	8	0.6951080253962454	top	2

## Sheet: significant_markers
query_id	dO2_resid_dt_coef	dO2_resid_dt_pval	AIC	dO2_resid_dt_pval_adj	seed_ortholog	evalue	score	eggNOG_OGs	max_annot_lvl	COG_category	Description	Preferred_name	GOs	EC	KEGG_ko	KEGG_Pathway	KEGG_Module	KEGG_Reaction	KEGG_rclass	BRITE	KEGG_TC	CAZy	BiGG_Reaction	PFAMs
c_000003320975	0.0003323686710876	7.95112e+10	-6158959736466690	0.0474195908350569
c_000004395896	0.0002370355423644	3.10194e+10	-6265129570448690	0.0389932268501622
c_000000548955	8.03001e+10	4.27193e+11	-7369173776195120	0.0474195908350569	2903.EOD35534	5.99e-61	211.0	COG0451@1|root,KOG1429@2759|Eukaryota	2759|Eukaryota	GM	UDP-glucuronate decarboxylase activity	GME	GO:0000166,GO:0003674,GO:0003824,GO:0005488,GO:0005575,GO:0005622,GO:0005623,GO:0005737,GO:0005829,GO:0005975,GO:0005996,GO:0006082,GO:0006732,GO:0006766,GO:0006767,GO:0008150,GO:0008152,GO:0009058,GO:0009108,GO:0009110,GO:0009987,GO:0016051,GO:0016053,GO:0016853,GO:0016854,GO:0016857,GO:0019752,GO:0019852,GO:0019853,GO:0036094,GO:0042364,GO:0043436,GO:0044237,GO:0044238,GO:0044249,GO:0044281,GO:…	5.1.3.18	ko:K10046	ko00053,ko00520,ko01100,ko01110,map00053,map00520,map01100,map01110	M00114	R00889,R07672,R07673	RC00289,RC00403,RC01780	ko00000,ko00001,ko00002,ko01000	-	-	-	Epimerase,Glycos_transf_2
c_000001488588	-4.43624e+10	9.00381e+10	-7855578091549050	0.0493362431579237	2903.EOD18340	2.099e-189	602.0	COG0369@1|root,KOG1158@2759|Eukaryota	2759|Eukaryota	P	NADPH-hemoprotein reductase activity	PETH	GO:0003674,GO:0005488,GO:0005507,GO:0005575,GO:0005622,GO:0005623,GO:0005737,GO:0009507,GO:0009534,GO:0009535,GO:0009536,GO:0009579,GO:0016020,GO:0031976,GO:0031984,GO:0032991,GO:0034357,GO:0042651,GO:0043167,GO:0043169,GO:0043226,GO:0043227,GO:0043229,GO:0043231,GO:0044422,GO:0044424,GO:0044425,GO:0044434,GO:0044435,GO:0044436,GO:0044444,GO:0044446,GO:0044464,GO:0046872,GO:0046914,GO:0055035,GO:…	1.18.1.2	ko:K02641	ko00195,ko01100,map00195,map01100	-	-	-	ko00000,ko00001,ko00194,ko01000	-	-	iRC1080.CRv4_Au5_s11_g2609_t1	NAD_binding_1
c_000003971661	3.82111e+09	6.18702e+10	-7881440135656280	0.0474195908350569
c_000002518728	-3.0188e+11	2.25458e+11	-8259935858513290	0.0370618274168375	554065.XP_005851170.1	6.154e-96	330.0	COG0330@1|root,KOG3083@2759|Eukaryota,37KTT@33090|Viridiplantae,34H6N@3041|Chlorophyta	3041|Chlorophyta	O	prohibitin homologues	-	-	-	ko:K17080	-	-	-	-	ko00000,ko03029,ko04147	-	-	-	Band_7
c_000003387585	2.96307e+10	1.50309e+11	-8158078274052440	0.0295963079703188	2903.EOD28676	5.331e-50	194.0	2DC0M@1|root,2S5J1@2759|Eukaryota	2759|Eukaryota	-	-	-	-	-	-	-	-	-	-	-	-	-	-	-
c_000004958299	-2.91548e+10	6.44948e+09	-8256213004211850	0.0229708825998528
c_000000201138	-2.42494e+10	4.84995e+10	-8070683217835660	0.0474195908350569
c_000004010194	2.10317e+11	2.56948e+10	-841656075618031	0.0389932268501622
c_000005108615	-2.09499e+11	1.73401e+10	-865635492714336	0.0152493467115509
c_000003729733	-1.98956e+08	7.65409e+10	-8559464627760360	0.0474195908350569
c_000002501087	1.97491e+11	8.10757e+10	-8410326342010650	0.0474195908350569
c_000005217466	-1.6263e+11	8.58127e+10	-8571612044224850	0.0482583689080379
c_000003205104	1.57316e+11	2.8996e+10	-860837256135943	0.0389932268501622	2903.EOD32422	7.617e-98	336.0	COG4586@1|root,KOG2355@2759|Eukaryota	2759|Eukaryota	L	ATPase activity	CAF16	GO:0000166,GO:0000288,GO:0000289,GO:0000956,GO:0003674,GO:0003824,GO:0005215,GO:0005488,GO:0005524,GO:0005575,GO:0005622,GO:0005623,GO:0005737,GO:0006139,GO:0006351,GO:0006352,GO:0006354,GO:0006355,GO:0006357,GO:0006366,GO:0006367,GO:0006368,GO:0006401,GO:0006402,GO:0006725,GO:0006807,GO:0008144,GO:0008150,GO:0008152,GO:0009056,GO:0009057,GO:0009058,GO:0009059,GO:0009314,GO:0009416,GO:0009628,GO:…	-	ko:K12608	ko03018,map03018	-	-	-	ko00000,ko00001,ko03019	-	-	-	ABC_tran
c_000002775935	1.31159e+10	2.14076e+10	-8988161635600270	0.0152493467115509
c_000000341189	-1.27078e+11	6.13949e+09	-9157265348261620	0.0229708825998528	2880.D7FM24	5.248e-23	113.0	COG2059@1|root,2QRJG@2759|Eukaryota	2759|Eukaryota	P	Chromate transporter	-	-	-	ko:K07240	-	-	-	-	ko00000,ko02000	2.A.51.1	-	-	Chromate_transp
c_000003683446	-1.1577e+11	5.60128e+10	-9094026702070210	0.0474195908350569
c_000005049376	-1.12541e+11	6.42351e+10	-8813337981924240	0.0474195908350569	159749.K0SNN4	2.539e-37	155.0	COG0143@1|root,KOG2241@2759|Eukaryota,2XGAH@2836|Bacillariophyta	2836|Bacillariophyta	J	Putative tRNA binding domain	-	-	-	-	-	-	-	-	-	-	-	-	tRNA_bind
c_000003007929	1.05857e+10	7.6167e+10	-9012495573218820	0.0474195908350569
c_000004563416	1.03686e+11	5.45087e+10	-904191692265603	0.0474195908350569	2903.EOD17389	1.159e-118	395.0	COG0415@1|root,KOG0133@2759|Eukaryota	2759|Eukaryota	L	DNA photolyase activity	phr	GO:0000166,GO:0000719,GO:0003674,GO:0003824,GO:0003904,GO:0003913,GO:0005488,GO:0006139,GO:0006259,GO:0006281,GO:0006290,GO:0006725,GO:0006807,GO:0006950,GO:0006974,GO:0008150,GO:0008152,GO:0009314,GO:0009411,GO:0009416,GO:0009628,GO:0009650,GO:0009987,GO:0016829,GO:0016830,GO:0033554,GO:0034641,GO:0036094,GO:0043167,GO:0043168,GO:0043170,GO:0044237,GO:0044238,GO:0044260,GO:0046483,GO:0048037,GO:…	4.1.99.3	ko:K01669	-	-	-	-	ko00000,ko01000,ko03400	-	-	-	DNA_photolyase
c_000003062274	1.02689e+10	8.19141e+10	-8986219367943660	0.0474195908350569
c_000005460645	-8.65072e+09	1.52344e+11	-934325212186524	0.0295963079703188
c_000002649036	-8.51434e+09	2.18913e+11	-9238576201473610	0.0370618274168375
c_000005558133	-8.41655e+09	1.12331e+11	-9257286465991720	0.0266724425043632
c_000000701616	-8.37909e+09	7.99675e+10	-9202154497314280	0.0474195908350569	2903.EOD38465	3.631e-62	275.0	KOG2171@1|root,KOG2171@2759|Eukaryota	2759|Eukaryota	S	ribosomal protein import into nucleus	IPO5	GO:0000060,GO:0001101,GO:0003674,GO:0005048,GO:0005215,GO:0005488,GO:0005575,GO:0005622,GO:0005623,GO:0005634,GO:0005635,GO:0005737,GO:0006606,GO:0006607,GO:0006610,GO:0006810,GO:0006886,GO:0006913,GO:0008104,GO:0008139,GO:0008150,GO:0008565,GO:0009719,GO:0009987,GO:0010033,GO:0010243,GO:0012505,GO:0015031,GO:0015833,GO:0016020,GO:0017038,GO:0031090,GO:0031965,GO:0031967,GO:0031974,GO:0031975,GO:…	-	ko:K20222	-	-	-	-	ko00000,ko03009	1.I.1	-	-	HEAT,HEAT_2,HEAT_EZ
c_000005324591	-8.28066e+09	5.11076e+10	-9205815251061340	0.0474195908350569	2903.EOD05767	6.381e-26	157.0	COG0525@1|root,KOG0432@2759|Eukaryota	2759|Eukaryota	J	valyl-tRNA aminoacylation	-	GO:0000003,GO:0003006,GO:0003674,GO:0003824,GO:0004812,GO:0004832,GO:0005575,GO:0005622,GO:0005623,GO:0005737,GO:0005739,GO:0005829,GO:0006082,GO:0006139,GO:0006399,GO:0006412,GO:0006418,GO:0006438,GO:0006518,GO:0006520,GO:0006725,GO:0006807,GO:0007275,GO:0008150,GO:0008152,GO:0009058,GO:0009059,GO:0009507,GO:0009536,GO:0009790,GO:0009791,GO:0009793,GO:0009987,GO:0010154,GO:0010467,GO:0016070,GO:…	6.1.1.9	ko:K01873	ko00970,map00970	M00359,M00360	R03665	RC00055,RC00523	ko00000,ko00001,ko00002,ko01000,ko01007,ko03016	-	-	-	Anticodon_1,Val_tRNA-synt_C,tRNA-synt_1
c_000003682731	7.89272e+09	2.96151e+10	-9306830470618570	0.0389932268501622	35128.Thaps260900	1.744e-09	72.0	COG0008@1|root,KOG1148@2759|Eukaryota,2XBJH@2836|Bacillariophyta	2836|Bacillariophyta	J	Belongs to the class-I aminoacyl-tRNA synthetase family	-	-	-	-	-	-	-	-	-	-	-	-	tRNA-synt_1c,tRNA-synt_1c_C
c_000002537012	7.85483e+08	7.39778e+10	-91778815937029	0.0474195908350569	2903.EOD14374	1.599e-275	912.0	COG0065@1|root,KOG0454@2759|Eukaryota	2759|Eukaryota	E	3-isopropylmalate dehydratase activity	LEU1	GO:0003674,GO:0003824,GO:0003861,GO:0005575,GO:0005622,GO:0005623,GO:0005737,GO:0005829,GO:0006082,GO:0006520,GO:0006551,GO:0006790,GO:0006807,GO:0008150,GO:0008152,GO:0008652,GO:0009058,GO:0009081,GO:0009082,GO:0009098,GO:0009507,GO:0009532,GO:0009536,GO:0009570,GO:0009987,GO:0010035,GO:0010038,GO:0010494,GO:0016053,GO:0016143,GO:0016144,GO:0016829,GO:0016835,GO:0016836,GO:0016853,GO:0016866,GO:…	2.4.1.183,4.2.1.33,4.2.1.35	ko:K00749,ko:K01702,ko:K01703	ko00290,ko00660,ko00966,ko01100,ko01110,ko01210,ko01230,map00290,map00660,map00966,map01100,map01110,map01210,map01230	M00432,M00535	R03896,R03898,R03968,R04001,R08620,R08624,R08628,R08634,R08641,R08645,R10170	RC00497,RC00976,RC00977,RC01041,RC01046,RC03072	br01601,ko00000,ko00001,ko00002,ko01000,ko01003	-	GT5	iMM904.YGL009C,iND750.YGL009C	Aconitase,Aconitase_C
c_000002750756	7.71742e+09	9.99024e+09	-9413875050961470	0.0266724425043632
c_000001544779	-6.64121e+09	4.60588e+10	-9634825756441880	0.0474195908350569	44056.XP_009034799.1	0.01018	53.0	2D0VM@1|root,2SFP4@2759|Eukaryota	2759|Eukaryota	-	-	-	-	-	-	-	-	-	-	-	-	-	-	-
c_000002615109	-6.35463e+09	8.21022e+10	-9430581386407460	0.0474195908350569	2903.EOD36159	1.513e-135	444.0	COG0596@1|root,KOG1454@2759|Eukaryota	2759|Eukaryota	O	regulation of endocannabinoid signaling pathway	-	-	-	-	-	-	-	-	-	-	-	-	Abhydrolase_1,Abhydrolase_6
c_000004358257	6.06722e+09	5.61511e+09	-957894862755405	0.0229708825998528	2903.EOD07330	5.501e-20	143.0	2A8IF@1|root,2QW1X@2759|Eukaryota	2759|Eukaryota	S	Surfeit locus protein 2 (SURF2)	Surf2	GO:0005575,GO:0005622,GO:0005623,GO:0005634,GO:0005654,GO:0005730,GO:0005886,GO:0016020,GO:0016604,GO:0016607,GO:0031974,GO:0031981,GO:0043226,GO:0043227,GO:0043228,GO:0043229,GO:0043231,GO:0043232,GO:0043233,GO:0044422,GO:0044424,GO:0044428,GO:0044446,GO:0044451,GO:0044464,GO:0070013,GO:0071944	-	-	-	-	-	-	-	-	-	-	SURF2
c_000005240797	-5.71493e+09	1.05392e+11	-9633091954990490	0.0266724425043632
c_000001261885	-5.49314e+09	8.00244e+10	-9636877134003950	0.0474195908350569	2903.EOD26840	9.149e-90	314.0	28MPG@1|root,2QU7F@2759|Eukaryota	2759|Eukaryota	U	Mitochondrial carrier protein	-	-	-	-	-	-	-	-	-	-	-	-	Mito_carr
c_000003108151	-4.56547e+09	1.45457e+08	-1.01632e+16	0.0003108413315443
c_000004109207	-3.27732e+10	3.87688e+10	-1.01287e+16	0.0460271410624462	2903.EOD33317	3.817e-126	462.0	29R50@1|root,2RXAA@2759|Eukaryota	2759|Eukaryota	S	Mpv17 / PMP22 family	-	-	-	ko:K13348	ko04146,map04146	-	-	-	ko00000,ko00001	-	-	-	ACT_6,Mpv17_PMP22
c_000001369763	-1.94497e+10	6.52873e+10	-1.01589e+16	0.0474195908350569
c_000002195199	-1.78434e+10	6.47848e+10	-1.0477e+16	0.0474195908350569

## Sheet: significant_TPL_markers
query_id	dO2_resid_dt_coef	dO2_resid_dt_pval	AIC	dO2_resid_dt_pval_adj	seed_ortholog	evalue	score	eggNOG_OGs	max_annot_lvl	COG_category	Description	Preferred_name	GOs	EC	KEGG_ko	KEGG_Pathway	KEGG_Module	KEGG_Reaction	KEGG_rclass	BRITE	KEGG_TC	CAZy	BiGG_Reaction	PFAMs
c_000004804952	-5161826068532720	5.19701e+10	8365400252382780	0.0381314168966606
c_000005213608	-2621144317177770	8.18559e+10	802263739641011	0.0499788579478805	2903.EOD28237	2.149e-38	192.0	COG2451@1|root,KOG0887@2759|Eukaryota	2759|Eukaryota	J	structural constituent of ribosome	RPL35A	GO:0000184,GO:0000956,GO:0002181,GO:0003674,GO:0003676,GO:0003723,GO:0003735,GO:0005198,GO:0005488,GO:0005575,GO:0005622,GO:0005623,GO:0005737,GO:0005829,GO:0005840,GO:0006139,GO:0006364,GO:0006396,GO:0006401,GO:0006402,GO:0006412,GO:0006413,GO:0006518,GO:0006605,GO:0006612,GO:0006613,GO:0006614,GO:0006725,GO:0006807,GO:0006810,GO:0006886,GO:0008104,GO:0008150,GO:0008152,GO:0008270,GO:0009056,GO:…	3.4.24.64	ko:K01412,ko:K02917	ko03010,map03010	M00177,M00179	-	-	br01610,ko00000,ko00001,ko00002,ko01000,ko01002,ko03011,ko03029	-	-	-	Ribosomal_L35Ae
c_000005761559	-1.82077e+16	3.84541e+10	739522780060576	0.0377190068860259
c_000002613580	-9179369463577490	6.46651e+10	7073120303352250	0.043184149398189	2903.EOD31444	1.769e-98	333.0	COG2007@1|root,KOG3283@2759|Eukaryota	2759|Eukaryota	J	structural constituent of ribosome	RPS8	GO:0000184,GO:0000313,GO:0000462,GO:0000956,GO:0002164,GO:0002181,GO:0002182,GO:0002376,GO:0002520,GO:0003674,GO:0003676,GO:0003723,GO:0003729,GO:0003735,GO:0005198,GO:0005488,GO:0005575,GO:0005618,GO:0005622,GO:0005623,GO:0005634,GO:0005654,GO:0005730,GO:0005737,GO:0005783,GO:0005829,GO:0005840,GO:0005844,GO:0005886,GO:0005911,GO:0006139,GO:0006364,GO:0006396,GO:0006401,GO:0006402,GO:0006412,GO:…	-	ko:K02995	ko03010,map03010	M00177,M00179	-	-	br01610,ko00000,ko00001,ko00002,ko03011	-	-	-	Ribosomal_S8e
c_000005711375	-6636070322284160	6.67611e+10	6788996122821810	0.0432328456991412
c_000001998679	5632307943669660	1.5388e+11	6626393106583500	0.0298490262976006
c_000004887195	-5540854263186730	1.67613e+11	648247166812011	0.0298490262976006
c_000001647932	-5247775681423230	5.0597e+10	6375072900286030	0.0381314168966606	159749.K0TH84	2.086e-57	211.0	COG0155@1|root,KOG0560@2759|Eukaryota,2XA5A@2836|Bacillariophyta	2836|Bacillariophyta	P	Nitrite and sulphite reductase 4Fe-4S domain	-	-	1.7.7.1	ko:K00366	ko00910,ko01120,map00910,map01120	M00531	R00790	RC00176	ko00000,ko00001,ko00002,ko01000	-	-	-	NIR_SIR,NIR_SIR_ferr
c_000000048687	-5231658082157510	1.88429e+09	6394246902377000	0.0080534460835069	2903.EOD18434	1.121e-38	159.0	KOG3215@1|root,KOG3215@2759|Eukaryota	2759|Eukaryota	F	mRNA-containing ribonucleoprotein complex export from nucleus	THOC7	GO:0000346,GO:0000347,GO:0000445,GO:0000781,GO:0005575,GO:0005622,GO:0005623,GO:0005634,GO:0005654,GO:0005694,GO:0005737,GO:0005829,GO:0006139,GO:0006396,GO:0006397,GO:0006403,GO:0006405,GO:0006406,GO:0006611,GO:0006725,GO:0006807,GO:0006810,GO:0006886,GO:0006913,GO:0006950,GO:0008104,GO:0008150,GO:0008152,GO:0008283,GO:0009266,GO:0009408,GO:0009628,GO:0009987,GO:0010467,GO:0015031,GO:0015833,GO:…	-	ko:K13176	ko03013,map03013	M00405,M00406	-	-	ko00000,ko00001,ko00002,ko03019,ko03041	-	-	-	THOC7
c_000005049376	-5087094901528010	1.01198e+11	6443231693537140	0.0216259111875296	159749.K0SNN4	2.539e-37	155.0	COG0143@1|root,KOG2241@2759|Eukaryota,2XGAH@2836|Bacillariophyta	2836|Bacillariophyta	J	Putative tRNA binding domain	-	-	-	-	-	-	-	-	-	-	-	-	tRNA_bind
c_000003800811	-4944668537686420	5.06833e+09	6360446196217960	0.0381314168966606	1150469.RSPPHO_00645	5.801e-97	332.0	COG2025@1|root,COG2025@2|Bacteria,1MUFI@1224|Proteobacteria,2TR10@28211|Alphaproteobacteria,2JPTQ@204441|Rhodospirillales	204441|Rhodospirillales	C	electron transfer flavoprotein, alpha subunit	etfA	-	-	ko:K03522	-	-	-	-	ko00000,ko04147	-	-	-	ETF,ETF_alpha
c_000003101518	4400497456017690	4.12109e+11	6406390528229230	0.0381314168966606
c_000005086131	4086147232266350	3.85e+10	6285848752484120	0.0377190068860259
c_000001649797	-4050339161011080	2.60248e+09	6231989869713670	0.0347593690190053	2903.EOD35666	5.178e-83	287.0	KOG1591@1|root,KOG1591@2759|Eukaryota	2759|Eukaryota	S	procollagen-proline 4-dioxygenase activity	-	-	1.14.11.2,3.6.4.12	ko:K00472,ko:K11136	ko00330,ko01100,map00330,map01100	-	R01252	RC00478	ko00000,ko00001,ko01000,ko03032	-	-	-	2OG-FeII_Oxy_3,ShK
c_000002287325	-3856049800571700	3.61081e+11	6142090501882950	0.0377190068860259	929556.Solca_3029	0.0003895	51.0	COG1361@1|root,COG4733@1|root,COG1361@2|Bacteria,COG4733@2|Bacteria	2|Bacteria	S	cellulase activity	-	-	-	-	-	-	-	-	-	-	-	-	CARDB,PKD,SLH,fn3
c_000001840147	3.64896e+16	5.83001e+09	6116796373965480	0.0138430404027443	2903.EOD28308	3.663e-13	81.0	COG2229@1|root,KOG0090@2759|Eukaryota	2759|Eukaryota	O	signal recognition particle binding	-	GO:0003674,GO:0005047,GO:0005488,GO:0005575,GO:0005622,GO:0005623,GO:0005737,GO:0005783,GO:0005785,GO:0005789,GO:0005791,GO:0012505,GO:0016020,GO:0030867,GO:0031090,GO:0031984,GO:0032991,GO:0042175,GO:0043021,GO:0043226,GO:0043227,GO:0043229,GO:0043231,GO:0044422,GO:0044424,GO:0044425,GO:0044432,GO:0044444,GO:0044446,GO:0044464,GO:0044877,GO:0098588,GO:0098796,GO:0098827	-	ko:K12272	ko03060,map03060	-	-	-	ko00000,ko00001,ko02044,ko04031	3.A.5.8	-	-	SRPRB
c_000005053259	-3.4035e+16	2.34926e+08	5928967806383540	0.0040119627802424
c_000004037119	-3309736806363020	4.32161e+11	6244742352717570	0.0381314168966606	2903.EOD19482	1.654e-56	208.0	COG0326@1|root,KOG0019@2759|Eukaryota	2759|Eukaryota	O	unfolded protein binding	-	GO:0006508,GO:0006511,GO:0006807,GO:0006950,GO:0008150,GO:0008152,GO:0009056,GO:0009057,GO:0009987,GO:0010033,GO:0010243,GO:0010498,GO:0019538,GO:0019941,GO:0030163,GO:0030433,GO:0033554,GO:0034976,GO:0036503,GO:0042221,GO:0043161,GO:0043170,GO:0043632,GO:0044237,GO:0044238,GO:0044248,GO:0044257,GO:0044260,GO:0044265,GO:0044267,GO:0050896,GO:0051603,GO:0051716,GO:0071704,GO:1901564,GO:1901565,GO:…	-	ko:K09487	ko04141,ko04151,ko04626,ko04657,ko04915,ko04918,ko05200,ko05215,ko05418,map04141,map04151,map04626,map04657,map04915,map04918,map05200,map05215,map05418	-	-	-	ko00000,ko00001,ko03110	-	-	-	HATPase_c,HATPase_c_3,HSP90
c_000006144258	-3212797146170220	3.07127e+10	5872338607662540	0.0102318354601643
c_000000510918	-3137302808312610	5.63214e+08	5719294273927120	0.0040119627802424	5872.XP_004830018.1	4.1e-11	67.0	2EYTP@1|root,2T08X@2759|Eukaryota,3YC9J@5794|Apicomplexa,3KFI9@422676|Aconoidasida,3Z3VR@5863|Piroplasmida	422676|Aconoidasida	S	Concanavalin A-like lectin/glucanases superfamily	-	-	-	-	-	-	-	-	-	-	-	-	Laminin_G_3
c_000000701616	-3.06739e+16	1.55999e+09	595706074715828	0.0080534460835069	2903.EOD38465	3.631e-62	275.0	KOG2171@1|root,KOG2171@2759|Eukaryota	2759|Eukaryota	S	ribosomal protein import into nucleus	IPO5	GO:0000060,GO:0001101,GO:0003674,GO:0005048,GO:0005215,GO:0005488,GO:0005575,GO:0005622,GO:0005623,GO:0005634,GO:0005635,GO:0005737,GO:0006606,GO:0006607,GO:0006610,GO:0006810,GO:0006886,GO:0006913,GO:0008104,GO:0008139,GO:0008150,GO:0008565,GO:0009719,GO:0009987,GO:0010033,GO:0010243,GO:0012505,GO:0015031,GO:0015833,GO:0016020,GO:0017038,GO:0031090,GO:0031965,GO:0031967,GO:0031974,GO:0031975,GO:…	-	ko:K20222	-	-	-	-	ko00000,ko03009	1.I.1	-	-	HEAT,HEAT_2,HEAT_EZ
c_000002810382	-3002145591026240	3.8831e+09	6006521513113990	0.0377190068860259
c_000003217377	-2888104941181320	2.50895e+09	5772563667338450	0.0347593690190053
c_000000231875	-2808693205428350	6.26589e+10	5980860829667380	0.043184149398189	2880.D7FT46	1.392e-98	344.0	COG1562@1|root,KOG1459@2759|Eukaryota	2759|Eukaryota	I	farnesyl-diphosphate farnesyltransferase activity	PSY	GO:0003674,GO:0003824,GO:0004337,GO:0004659,GO:0005575,GO:0005622,GO:0005623,GO:0005737,GO:0006629,GO:0006720,GO:0006721,GO:0008150,GO:0008152,GO:0008299,GO:0008610,GO:0009058,GO:0009507,GO:0009536,GO:0009975,GO:0009987,GO:0016108,GO:0016109,GO:0016114,GO:0016116,GO:0016117,GO:0016119,GO:0016120,GO:0016740,GO:0016765,GO:0016767,GO:0016853,GO:0016860,GO:0042214,GO:0042440,GO:0043226,GO:0043227,GO:…	2.5.1.32,2.5.1.99,4.1.2.13,5.5.1.19	ko:K01623,ko:K02291,ko:K17841	ko00010,ko00030,ko00051,ko00680,ko00710,ko00906,ko01062,ko01100,ko01110,ko01120,ko01130,ko01200,ko01230,map00010,map00030,map00051,map00680,map00710,map00906,map01062,map01100,map01110,map01120,map01130,map01200,map01230	M00001,M00003,M00097,M00165,M00167	R01068,R01070,R01829,R02065,R02568,R03824,R04218,R05341,R07270,R10177,R10508	RC00362,RC00438,RC00439,RC00603,RC00604,RC01004,RC01101,RC02869	ko00000,ko00001,ko00002,ko01000,ko01006,ko03036,ko04131,ko04147	-	-	-	SQS_PSY
c_000003270046	-262498293180288	3.35156e+09	581441535626497	0.0102318354601643	2903.EOD05485	2.827e-12	79.0	2BH2D@1|root,2S1AQ@2759|Eukaryota	2759|Eukaryota	S	Bestrophin, RFP-TM, chloride channel	-	-	-	ko:K08994	-	-	-	-	ko00000,ko02000	1.A.46.2	-	-	Bestrophin
c_000004406210	2564470697957210	5.06043e+10	5891457507305790	0.0381314168966606	2903.EOD28111	4.961e-09	69.0	COG2057@1|root,KOG3822@2759|Eukaryota	2759|Eukaryota	I	3-oxoacid CoA-transferase activity	-	-	-	-	-	-	-	-	-	-	-	-	CoA_trans
c_000001942614	2.50158e+16	3.10148e+11	5781052958958980	0.036821516596841	2903.EOD38486	2.039e-255	839.0	COG0499@1|root,KOG1370@2759|Eukaryota	2759|Eukaryota	H	adenosylhomocysteinase activity	AHCYL1	GO:0000096,GO:0000097,GO:0000166,GO:0001666,GO:0002028,GO:0002376,GO:0002437,GO:0002439,GO:0002544,GO:0003674,GO:0003824,GO:0004013,GO:0005488,GO:0005507,GO:0005515,GO:0005575,GO:0005576,GO:0005622,GO:0005623,GO:0005634,GO:0005737,GO:0005783,GO:0005789,GO:0005829,GO:0005856,GO:0005886,GO:0005938,GO:0006082,GO:0006139,GO:0006152,GO:0006378,GO:0006396,GO:0006397,GO:0006520,GO:0006534,GO:0006555,GO:…	3.1.1.1,3.1.1.56,3.1.1.84,3.3.1.1	ko:K01251,ko:K03927	ko00270,ko00983,ko01100,map00270,map00983,map01100	M00035	R00192,R04936,R08220,R08255,R08258	RC00041,RC00056,RC00069,RC00475,RC00476,RC01161,RC01243,RC02264	ko00000,ko00001,ko00002,ko01000,ko01009,ko04147	-	CE10	iRC1080.CRv4_Au5_s3_g11226_t1	AdoHcyase,AdoHcyase_NAD
c_000003761260	-2492578559911390	2.48928e+11	5738959999009960	0.0347593690190053	227086.JGI_V11_54478	3.183e-69	250.0	KOG0756@1|root,KOG0756@2759|Eukaryota	2759|Eukaryota	U	mitochondrial tricarboxylic acid transmembrane transport	SLC25A1	GO:0003674,GO:0005215,GO:0005342,GO:0005575,GO:0005622,GO:0005623,GO:0005737,GO:0005739,GO:0005740,GO:0005743,GO:0005975,GO:0005996,GO:0006006,GO:0006094,GO:0006139,GO:0006163,GO:0006164,GO:0006637,GO:0006725,GO:0006732,GO:0006753,GO:0006790,GO:0006793,GO:0006796,GO:0006807,GO:0006810,GO:0006811,GO:0006820,GO:0006839,GO:0006842,GO:0006843,GO:0006855,GO:0008150,GO:0008152,GO:0008509,GO:0008514,GO:…	-	ko:K04646,ko:K15100	ko04142,ko04144,ko04721,ko04961,ko05016,ko05100,map04142,map04144,map04721,map04961,map05016,map05100	-	-	-	ko00000,ko00001,ko02000,ko04131,ko04147	2.A.29.7	-	-	Mito_carr
c_000005240797	-2445379972707960	4.65064e+09	5664717696355240	0.0124230247847289
c_000000303895	-2.43879e+16	7.96524e+10	5923946779235200	0.0499788579478805
c_000002559424	-1.8275e+16	4.609e+08	5417041301908460	0.0040119627802424
c_000002353643	-1.75256e+16	5.35303e+11	5443038116086490	0.0381314168966606
c_000004909224	1.41194e+16	5.00286e+10	5576466945034610	0.0381314168966606
c_000001976687	1.22491e+16	2.31681e+09	5137996946799070	0.0347593690190053	2903.EOD36429	2.39e-46	179.0	COG5022@1|root,KOG2502@1|root,KOG0161@2759|Eukaryota,KOG2502@2759|Eukaryota	2759|Eukaryota	S	phosphatidylinositol binding	MYO16	-	-	ko:K10352,ko:K10358,ko:K17481,ko:K17751	ko04260,ko04261,ko04530,ko05416,map04260,map04261,map04530,map05416	-	-	-	ko00000,ko00001,ko01009,ko04131,ko04147,ko04812	-	-	-	Myosin_head,NYAP_N,Tub
c_000003802233	-9695781634460760	3.05244e+10	3178092360448510	0.036821516596841	2903.EOD34895	7.143e-80	282.0	COG0484@1|root,KOG0712@2759|Eukaryota	2759|Eukaryota	O	heat shock protein binding	-	-	-	ko:K09502	ko04141,map04141	-	-	-	ko00000,ko00001,ko03110,ko04131	-	-	-	DnaJ,DnaJ_C
