# Supplementary material for: Transcriptome-resolved diel metabolism of a coastal Phaeocystis bloom links cellular physiology to carbon cycling
Source: Research Square preprint supplement (doi:10.21203/rs.3.rs-6767494/v1), 2025-06-03
Supplement: Supplementary file 3 [file ba2bd787e4d2ee98dd08c568.xlsx]

## Sheet: RNA_Lab_sample_name_x0009_SW_filtered
sample_name	SW_filtered	eluate_volume_mL	rna_extraction_vol_mL	RNA_conc_ng_µl	RNA_eluate_µL	µl_RNA_used _for_start_LP	pre_dil	ng_RNA_used_for_start_LP	µl_ERCC_spike	ERCC_dilution	sequenced_at	standards_added_by	standards_added_before
51_1	50	9	4	12.495	50	16.01	1	200	3	0.001	Macrogen	Macrogen	library_preparation
51_2	50	8	4	42.343	50	4.72	1	200	4	0.001	Macrogen	Macrogen	library_preparation
51_3	50	8	4	14.229	50	14.06	1	200	4	0.001	Macrogen	Macrogen	library_preparation
51_4	50	7	3	9.321	50	21.46	1	200	4	0.001	Macrogen	Macrogen	library_preparation
51_5	50	7	3	11.412	50	17.53	1	200	4	0.001	Macrogen	Macrogen	library_preparation
51_6	50	7.5	3	23.55	50	8.49	1	200	4	0.001	Macrogen	Macrogen	library_preparation
51_7	50	10	4	40.043	50	4.99	1	200	4	0.001	Macrogen	Macrogen	library_preparation
51_8	50	6	3	13.91	50	14.38	1	200	4	0.001	Macrogen	Macrogen	library_preparation
51_9	50	10	4	10.741	50	18.62	1	200	2.8	0.001	Macrogen	Macrogen	library_preparation
51_10	50	7	3	103.196	50	1.94	1	200	4	0.001	Macrogen	Macrogen	library_preparation
51_11	50	3	2	143.186	50	1.4	1	200	4	0.001	Macrogen	Macrogen	library_preparation
51_12	50	5.5	2	29.987	50	6.67	1	200	4	0.001	Macrogen	Macrogen	library_preparation
51_13	50	8	4	78.164	50	2.56	1	200	4	0.001	Macrogen	Macrogen	library_preparation
51_14	50	7	3	51.721	50	3.87	1	200	4	0.001	Macrogen	Macrogen	library_preparation
51_15	50	12.5	2	67.632	50	2.96	1	200	4	0.001	Macrogen	Macrogen	library_preparation
51_16	50	6.5	3	62.258	50	3.21	1	200	4	0.001	Macrogen	Macrogen	library_preparation
51_17	50	9.5	4	96.849	50	2.07	1	200	4	0.001	Macrogen	Macrogen	library_preparation
51_18	50	12	4	73.045	50	2.74	1	200	4	0.001	Macrogen	Macrogen	library_preparation
51_19	50	9	4	26.213	50	7.63	1	200	4	0.001	Macrogen	Macrogen	library_preparation
51_20	50	8	4	6.095	50	32.81	1	200	2.8	0.001	Macrogen	Macrogen	library_preparation
51_21	50	9	4	48.876	50	4.09	1	200	4	0.001	Macrogen	Macrogen	library_preparation
130_1	30	10	5	6.738	50	29.68	1	200	2.96	0.001	Macrogen	Macrogen	library_preparation
130_2	30	9	9	41.47	50	4.82	1	200	4	0.001	Macrogen	Macrogen	library_preparation
130_3	30	9	5	28.503	50	7.02	1	200	4	0.001	Macrogen	Macrogen	library_preparation
130_4	30	8.5	4	58.995	50	3.39	1	200	4	0.001	Macrogen	Macrogen	library_preparation
130_5	50	7.5	3	76.235	50	2.62	1	200	4	0.001	Macrogen	Macrogen	library_preparation
130_6	30	6.5	3	32.364	50	6.18	1	200	4	0.001	Macrogen	Macrogen	library_preparation
130_7	50	6	3	97.135	50	2.06	1	200	4	0.001	Macrogen	Macrogen	library_preparation
130_8	50	7.5	3	27.856	50	7.18	1	200	4	0.001	Macrogen	Macrogen	library_preparation
130_9	50	9.5	5	65.535	50	3.05	1	200	4	0.001	Macrogen	Macrogen	library_preparation
130_10	50	6.5	6.5	160.176	50	1.25	1	200	4	0.001	Macrogen	Macrogen	library_preparation
130_11	50	10	4	25.222	50	7.93	1	200	4	0.001	Macrogen	Macrogen	library_preparation
130_12	50	9.5	4	18.485	50	10.82	1	200	4	0.001	Macrogen	Macrogen	library_preparation
130_13	50	8.5	4	65.835	50	3.04	1	200	4	0.001	Macrogen	Macrogen	library_preparation
130_14	50	9	4	51.366	50	3.89	1	200	4	0.001	Macrogen	Macrogen	library_preparation
130_15	50	7.5	3	28.294	50	7.07	1	200	4	0.001	Macrogen	Macrogen	library_preparation
130_16	50	5.5	3	22.284	50	8.98	1	200	4	0.001	Macrogen	Macrogen	library_preparation
130_17	50	7.5	3	67.514	50	2.96	1	200	4	0.001	Macrogen	Macrogen	library_preparation
130_18	50	12	6	111.325	50	1.8	1	200	4	0.001	Macrogen	Macrogen	library_preparation
130_19	40	8	3	71.625	50	2.79	1	200	4	0.001	Macrogen	Macrogen	library_preparation
130_20	50	8	3	37.327	50	5.36	1	200	4	0.001	Macrogen	Macrogen	library_preparation
130_21	50	9	4	119.905	50	1.67	1	200	4	0.001	Macrogen	Macrogen	library_preparation
130_22	50	8	3	125.93	50	1.59	1	200	4	0.001	Macrogen	Macrogen	library_preparation
130_23	50	9	4	126.098	50	1.59	1	200	4	0.001	Macrogen	Macrogen	library_preparation
130_24	50	9	4	55.47	50	3.61	1	200	4	0.001	Macrogen	Macrogen	library_preparation
130_25	50	6	3	46.567	50	4.29	1	200	4	0.001	Macrogen	Macrogen	library_preparation
Columns
sample_name	name of the sample (station_number)
SW_filtered	amount of seawater filtered in L over the 50-250 µm sieves
eluate_volume_mL	amount of filtered seawater that was used to capture the filtered residu
rna_extraction_vol_mL	mL of filter eluate used at the start of the RNA extraction protocol
RNA_conc_ng_µl	concentration of RNA after the extraction protocol
RNA_eluate_µL	RNA eluate quantity in µL
µl_RNA_used _for_start_LP	µL total RNA used for library preparation
pre_dil	predilution step
ng_RNA_used_for_start_LP	ng total RNA used for library preparation
µl_ERCC_spike	µL ERCC spike in mix used at the start of the library protocol
ERCC_dilution	dilution of ERCC Spike-In Mix
sequenced_at	sequencing provider
standards_added_by
standards_added_before

## Sheet: TEP_filter_specs
Station	filtrated volume (ml)	Alcian Blue (ml)		Station	filtrated volume (ml)	Alcian Blue (ml)		Product name	Whatman® Nuclepore™ Track-Etched Membranes, diam. (47 mm), pore size 0.4 μm, polycarbonate, pack of 100 ea
130-1	150	1.5		51-1	150	1.5		Material	polycarbonate
130-2	100	1.5		51-2	150	1.5		Sterility	non-sterile
130-3	100	1.5		51-3	150	1.5		Packaging	pack of 100 ea
130-4	100	1.5		51-4	150	1.5		Manufacturer	Whatman 10417112
130-5	100	1.5		51-5	150	1.5		Diameter	47 mm
130-5	100	1.5		51-6	150	1.5		Pore size	0.4 μm pore size
130-6	100	1.5		51-7	150	1.5
130-7	100	1.5		51-8	150	1.5
130-8	100	1.5		51-9	150	1.5
130-9	100	1.5		51-10	150	1.5
130-10	100	1.5		51-11	150	1.5
130-11	100	1.5		51-12	150	1.5
130-12	100	1.5		51-13	150	1.5
130-13	100	1.5		51-14	150	1.5
130-14	100	1.5		51-15	150	1.5
130-15	100	1.5		51-16	150	1.5
130-16	100	1.5		51-17	150	1.5
130-17	100	1.5		51-18	150	1.5
130-18	100	1.5		51-19	150	1.5
130-19	100	1.5		51-20	150	1.5
130-20	100	1.5		51-21	150	1.5
130-21	100	1.5		Blanks (milli q)	150	1.5
130-22	100	1.5
130-23	100	1.5
130-24	100	1.5
130-25	100	1.5
Blancs (Milli q)	100	1.5

## Sheet: TEP_results
Sample number	TEP concentration (1 replicate)	TEP concentration (2 replicate)	TEP concentration (3 replicate)	average-blank
51_B	0.099	0.119	0.15	0.122667
51_1	0.102	0.117	0.184	35.6955
51_2	0.159	0.122	0.176	76.3323
51_3	0.171	0.145	0.164	93.6405
51_4	0.136	0.192	0.176	111.701
51_5	0.132	0.164	0.191	98.9083
51_6	0.137	0.18	0.202	122.989
51_7	0.147	0.156	0.172	89.8779
51_8	0.111	0.171	0.172	74.0747
51_9	0.148	0.174		95.8981
51_10	0.154	0.147	0.18	94.3931
51_11	0.129	0.15	0.166	47.3597
51_12	0.157	0.187		120.732
51_13	0.172	0.179	0.198	145.565
51_14	0.159	0.181		116.217
51_15	0.185	0.136	0.176	106.434
51_16	0.132	0.184	0.162	92.1355
51_17	0.208	0.311	0.202	275.001
51_18	0.171	0.237	0.2	189.965
51_19	0.217	0.159	0.18	150.833
51_20	0.307	0.192	0.238	287.042
51_21	0.242	0.23		265.218
130_B	0.145	0.136	0.155	0.145333
130_1	0.292	0.549	0.279	524.09
130_2	0.467	0.369	0.239	735.338
130_3	0.224	0.669	0.248	809.839
130_4	0.33	0.41	0.272	664.224
130_5	0.551	0.505	0.299	1051.4
130_6	0.275	0.434		722.357
130_7	0.417	0.904	0.234	1277.16
130_8	0.265	0.28	0.206	369.607
130_9	0.386	0.485	0.343	892.242
130_10	0.273	0.43	0.27	620.201
130_11	0.423	0.467	0.234	790.65
130_12	0.607	0.481	0.544	1364.08
130_13	0.398	0.256	0.285	581.822
130_14	0.286	0.374	0.233	529.897
130_15	0.29	0.208	0.2	309.781
130_16	0.313	0.271	0.268	483.616
130_17	0.2	0.292	0.236	343.645
130_18	0.365	0.325	0.29	628.102
130_19	0.558	0.425	0.303	973.515
130_20	0.292	0.286	0.209	410.244
130_21	0.226	0.342	0.264	461.04
130_22	0.346	0.418	0.255	672.126
130_23	0.355	0.347	0.254	601.011
130_24	0.463	0.423	0.32	883.211
130_25	0.279	0.373	0.23	517.48

## Sheet: samples_env
Station	StationPrefix	StationSuffix	Latitude	Longitude	Date (UTC)	day_moment	day_length	Temperature	Salinity	Conductivity	Depth	Oxygen	Fluorescence	NH4	NO2	NO3	NOX	PO4	Si	TEP	sea_surface_height_above_sea_level	surface_baroclinic_sea_water_velocity
51_1	51	1	5153166115	318280367	2023-04-18 11:11:00	Day	1.40333e+16	99259	32513	3575	23.33	2744651273	200184795081967	3.08	0.16	6.96	7.12	0.1	7.24	658466666666667	18170393	0.7373135
51_2	51	2	515333918	318408467	2023-04-18 12:05:00	Day	1.40333e+16	99105	32683	3.59	23.49	2744544909		3.45	0.15	6.19	6.34	0.14	7.06	1674386666666660	21294794	0.9335772
51_3	51	3	5153276325	318511267	2023-04-18 13:08:00	Day	1.40333e+16	99231	32661	3589	22.84	2700705094	147271787439614	3.53	0.15	6.13	6.28	0.12	7.13	2.10709e+16	18520634	0.8448625
51_4	51	4	5153324353	31843455	2023-04-18 14:05:00	Day	1.40333e+16	99013	32703	3592	22.12	2657785184	142371139705882							2.55861e+16	1210772	0.6455384
51_5	51	5	5153310405	318357533	2023-04-18 15:07:00	Day	1.40333e+16	99336	32.59	3584	21.37	2653181697	131557931034483	4.18	0.15	6.54	6.69	0.15	7.53	2.23879e+16	0.336479	0.4895043
51_6	51	6	5153270977	31827565	2023-04-18 16:00:00	Day	1.40333e+16	99587	32363	3564	20.7	2677040029	136834433656958	5.04	0.21	8.19	8.4	0.15	7.61	2840813333333330	-0.6603141	0.54465216
51_7	51	7	5153225837	318231933	2023-04-18 17:03:00	Day	1.40333e+16	10016	32414	3573	19.95	2689530823	173982226415094	4.67	0.18	7.89	8.07	0.16	7.4	2.01303e+16	-13293008	0.6975722
51_8	51	8	5153196617	318248367	2023-04-18 18:04:00	Day	1.40333e+16	9981	32388	3568	19.9	268547966	182737239263804	4.7	0.19	7.89	8.08	0.15	7.34	1617946666666660	-13994112	0.8565167
51_9	51	9	5153171763	318260567	2023-04-18 19:11:00	Civil twilight	1.40333e+16	10007	31923	3524	20.28	2752914646	188164253731343	5.97	0.26	11.32	11.58	0.2	7.26	2.16353e+16	-10461948	10057411
51_10	51	10	5153166505	3182699	2023-04-18 20:05:00	Nautical twilight	1.40333e+16	99028	32499	3572	20.74	2700822798	186815922330097	4.31	0.17	7.27	7.44	0.13	7.21	2125906666666660	-0.6434913	0.9462169
51_11	51	11	5153164632	3182801	2023-04-18 21:07:00	Night	1.40333e+16	99049	32431	3565	21.07	2684049954	154689270072993	4.64	0.18	7.22	7.4	0.13	7.4	1.44863e+16	-0.23324051	0.7251487
51_12	51	12	5153167673	318275017	2023-04-18 22:02:00	Night	1.40333e+16	99109	32.55	3577	21.79	2713369144	243180896551724	3.91	0.16	6.79	6.95	0.11	7.11	2784373333333330	0.31398857	0.42292896
51_13	51	13	5153229585	3184006	2023-04-18 23:11:00	Night	1.40333e+16	99041	32591	3581	23.1	2726424416	276725038167939	3.64	0.15	6.0	6.15	0.09	6.46	3405213333333330	12648548	0.4853252
51_14	51	14	5153268237	318507283	2023-04-19 00:07:00	Night	14.1	99017	32807	3602	23.22	2755722005	250305	2.61	0.13	5.47	5.6	0.07	6.88	2671493333333330	18360546	0.885866
51_15	51	15	5153293793	318499683	2023-04-19 01:03:00	Night	14.1	98734	32709	3589	22.91	2716550041	200256181102362	3.52	0.15	6.08	6.23	0.12	7.02	242692	16362762	0.9056795
51_16	51	16	5153315838	318479283	2023-04-19 01:59:00	Night	14.1	9862	32591	3577	22.36	2679539631	173248339483395	3.67	0.15	5.66	5.81	0.11	6.23	2069466666666660	10954129	0.71245617
51_17	51	17	515333137	318408417	2023-04-19 02:59:00	Astronomical twilight	14.1	9868	32492	3568	21.57	2662156576	151669633507853	4.36	0.18	7.04	7.22	0.16	7.26	6641106666666660	0.3149788	0.5243286
51_18	51	18	5153299992	318324233	2023-04-19 04:00:00	Nautical twilight	14.1	98746	32403	3.56	20.71	2653512922	148150977011494							4515200000000000	-0.6607932	0.49354902
51_19	51	19	5153262397	31829945	2023-04-19 05:02:00	Day	14.1	98607	32347	3552	19.86	2662536966	177451196172249	4.82	0.19	7.92	8.11	0.13	6.86	3.53691e+16	-15194819	0.6028386
51_20	51	20	5153239032	318242717	2023-04-19 06:02:00	Day	14.1	98745	32.14	3533	19.27	2702004068	169179945054945	5.59	0.23	9.28	9.51	0.18	7.08	6942120000000000	-19320984	0.7479058
51_21	51	21	5153185117	3182475	2023-04-19 07:03:00	Day	14.1	98677	32246	3543	19.63	2716602395	152763958333333	5.56	0.22	9.13	9.35	0.17	6.98	6396533333333330	-1680978	0.9411963
130_1	130	1	5121634923	285125683	2023-04-20 08:01:00	Day	1.41333e+16	105994	31418	3524	8.62	285687527	178296050359712	1.82	0.38	12.96	13.34	0.05	13.2	1286832	-18029729	0.5433187
130_2	130	2	5121640675	2851156	2023-04-20 09:02:00	Day	1.41333e+16	105378	31236	3501	9.26	2855084966	123877805194805	1.71	0.34	14.91	15.25	0.06	13.29	1.20217e+16	-10693929	0.5629196
130_3	130	3	5121643983	2851073	2023-04-20 10:06:00	Day	1.41333e+16	104671	31121	3483	10.14	2867192335	86453829787234	1.34	0.37	17.44	17.81	0.05	14.3	1326.34	-0.29054138	0.3610206
130_4	130	4	5121701807	285302233	2023-04-20 11:07:00	Day	1.41333e+16	104846	31234	3496	12.32	289157206	820415448275862	2.02	0.35	15.94	16.29	0.05	13.36	1083648	11877614	0.33853707
130_5	130	5	5121775138	285211133	2023-04-20 12:00:00	Day	1.41333e+16	104787	31152	3487	13.38	2918416282		1.4	0.3	17.13	17.43	0.05	12.82	1.72895e+16	25873802	0.86556655
130_6	130	6	5121775447	2851928	2023-04-20 13:01:00	Day	1.41333e+16	105643	31969	3576	13.28	296534491		0.68	0.19	6.58	6.77	0.04	11.47	1.18054e+16	27053766	0.7004903
130_7	130	7	5121770363	285238283	2023-04-20 13:58:00	Day	1.41333e+16	105962	32289	3612	12.88	3009730152		0.71	0.16	4.42	4.58	0.03	10.63	2105212	22970655	0.46226195
130_8	130	8	512166767	28521895	2023-04-20 14:57:00	Day	1.41333e+16	106031	32569	3.64	11.52	3050150821		0.3	0.1	1.9	2.0	0.04	10.62	5926200000000000	13684465	0.16050242
130_9	130	9	5121640387	285122467	2023-04-20 15:58:00	Day	1.41333e+16	106638	32342	3623	10.43	3028595331	137747812	0.43	0.11	1.67	1.78	0.05	10.76	1463677333333330	0.1971385	0.31624594
130_10	130	10	5121649515	285099217	2023-04-20 17:07:00	Day	1.41333e+16	106523	32125	3.6	9.29	3036516721	137766042918455	1.66	0.22	6.94	7.16	0.06	12.24	1.01028e+16	-0.96620035	0.6994983
130_11	130	11	512166476	285087883	2023-04-20 18:04:00	Day	1.41333e+16	106196	31819	3566	8.56	2971620272	154020128865979	2.19	0.26	7.08	7.34	0.07	11.08	1.29436e+16	-18161339	0.67348343
130_12	130	12	5121663872	28508655	2023-04-20 18:59:00	Civil twilight	1.41333e+16	105362	31376	3515	8.33	2860329107	172841354716981	1.74	0.33	14.21	14.54	0.08	13.22	2250074666666660	-21027343	0.631503
130_13	130	13	5121659735	285089017	2023-04-20 20:02:00	Nautical twilight	1.41333e+16	105101	30957	3.47	8.98	2856068295	918940547945206	2.01	0.4	18.8	19.2	0.09	13.93	9463106666666660	-16203258	0.66410834
130_14	130	14	5121660007	285090667	2023-04-20 21:02:00	Astronomical twilight	1.41333e+16	104449	30687	3438	9.63	2854897308		2.46	0.45	23.37	23.82	0.11	15.2	8597693333333330	-0.90821767	0.57005006
130_15	130	15	5121660538	285090283	2023-04-20 22:02:00	Night	1.41333e+16	103731	30394	3.4	10.15	2807660967	433744033149171	3.09	0.52	26.73	27.25	0.14	15.2	4929093333333330	-0.25208625	0.3973726
130_16	130	16	5121655165	285097467	2023-04-20 22:58:00	Night	1.41333e+16	102875	29972	3.35	11.48	2758867805	413569534883721	4.06	0.59	32.12	32.71	0.19	16.59	7826346666666660	0.7444835	0.08271558
130_17	130	17	5121876872	285267783	2023-04-20 23:57:00	Night	1.41333e+16	103815	30727	3435	13.79	2859394918	554762267857143	1.91	0.41	23.14	23.55	0.11	14.7	5493493333333330	23121648	0.8840067
130_18	130	18	5121792267	285398467	2023-04-21 01:01:00	Night	14.2	104159	31112	3477	13.06		696653592592593	2.15	0.39	19.95	20.34	0.11	14.02	1.02345e+16	26763906	0.7919397
130_19	130	19	5121887658	285274083	2023-04-21 02:00:00	Night	14.2	104284	31276	3495	13.25		145187993288591	1.81	0.32	14.49	14.81	0.07	13.38	1.59913e+16	22352016	0.6920742
130_20	130	20	512189212	2852949	2023-04-21 03:00:00	Astronomical twilight	14.2	103868	31833	3548	12.38			0.92	0.25	9.54	9.79	0.06	12.53	6603479999999990	14415766	0.40618408
130_21	130	21	5121813213	285224033	2023-04-21 04:00:00	Nautical twilight	14.2	103065	31915	3548	10.98			1.35	0.18	5.76	5.94	0.04	8.76	7450080000000000	0.3713857	0.11336283
130_22	130	22	5121813668	285208383	2023-04-21 05:00:00	Day	14.2	102812	31463	3501	10.06			1.82	0.32	13.83	14.15	0.05	13.6	1.09682e+16	-0.7791324	0.44502315
130_23	130	23	5121803543	285204717	2023-04-21 06:00:00	Day	14.2	103155	31.19	3477	8.99			2.45	0.4	17.7	18.1	0.05	14.01	9782933333333330	-17505125	0.47337392
130_24	130	24	512179908	285206817	2023-04-21 07:00:00	Day	14.2	10371	31057	3468	8.43			2.18	0.4	19.42	19.82	0.07	14.47	1.44863e+16	-23294938	0.44196945
130_25	130	25	5121795863	2852102	2023-04-21 08:00:00	Day	14.2	103828	30709	3434	8.53									8390746666666660	-22810285	0.45879024

## Sheet: samples
sample_name	date	time (UTC+2)	station	SW filtered (L)	Eluate volume (mL)	RNA extraction volume (mL)
51_1	2023-04-18	13:00:00	51	50	9	4
51_2	2023-04-18	14:00:00	51	50	8	4
51_3	2023-04-18	15:00:00	51	50	8	4
51_4	2023-04-18	16:00:00	51	50	7	3
51_5	2023-04-18	17:00:00	51	50	7	3
51_6	2023-04-18	18:00:00	51	50	7.5	3
51_7	2023-04-18	19:00:00	51	50	10	4
51_8	2023-04-18	20:00:00	51	50	6	3
51_9	2023-04-18	21:00:00	51	50	10	4
51_10	2023-04-18	22:00:00	51	50	7	3
51_11	2023-04-18	23:00:00	51	50	3	2
51_12	2023-04-19	00:00:00	51	50	5.5	2
51_13	2023-04-19	01:00:00	51	50	8	4
51_14	2023-04-19	02:00:00	51	50	7	3
51_15	2023-04-19	03:00:00	51	50	12.5	2
51_16	2023-04-19	04:00:00	51	50	6.5	3
51_17	2023-04-19	05:00:00	51	50	9.5	4
51_18	2023-04-19	06:00:00	51	50	12	4
51_19	2023-04-19	07:00:00	51	50	9	4
51_20	2023-04-19	08:00:00	51	50	8	4
51_21	2023-04-19	09:00:00	51	50	9	4
130_1	2023-04-20	10:00:00	130	30	10	5
130_2	2023-04-20	11:00:00	130	30	9	9
130_3	2023-04-20	12:00:00	130	30	9	5
130_4	2023-04-20	13:00:00	130	30	8.5	4
130_5	2023-04-20	14:00:00	130	50	7.5	3
130_6	2023-04-20	15:00:00	130	30	6.5	3
130_7	2023-04-20	16:00:00	130	50	6	3
130_8	2023-04-20	17:00:00	130	50	7.5	3
130_9	2023-04-20	18:00:00	130	50	9.5	5
130_10	2023-04-20	19:00:00	130	50	6.5	6.5
130_11	2023-04-20	20:00:00	130	50	10	4
130_12	2023-04-20	21:00:00	130	50	9.5	4
130_13	2023-04-20	22:00:00	130	50	8.5	4
130_14	2023-04-20	23:00:00	130	50	9	4
130_15	2023-04-21	00:00:00	130	50	7.5	3
130_16	2023-04-21	01:00:00	130	50	5.5	3
130_17	2023-04-21	02:00:00	130	50	7.5	3
130_18	2023-04-21	03:00:00	130	50	12	6
130_19	2023-04-21	04:00:00	130	40	8	3
130_20	2023-04-21	05:00:00	130	50	8	3
130_21	2023-04-21	06:00:00	130	50	9	4
130_22	2023-04-21	07:00:00	130	50	8	3
130_23	2023-04-21	08:00:00	130	50	9	4
130_24	2023-04-21	09:00:00	130	50	9	4
130_25	2023-04-21	10:00:00	130	50	6	3

## Sheet: ERCC_Controls_Analysis
Re-sort ID	ERCC_ID	subgroup	concentration_Mix_1	concentration_Mix_2	expected_fold_change ratio	log2_Mix_1_Mix_2
1	ERCC-00130	A	30000	7500	4	2
2	ERCC-00004	A	7500	1875	4	2
3	ERCC-00136	A	1875	468.75	4	2
4	ERCC-00108	A	937.5	234375	4	2
5	ERCC-00116	A	468.75	1171875	4	2
6	ERCC-00092	A	234375	5859375	4	2
7	ERCC-00095	A	1171875	29296875	4	2
8	ERCC-00131	A	1171875	29296875	4	2
9	ERCC-00062	A	5859375	146484375	4	2
10	ERCC-00019	A	29296875	732421875	4	2
11	ERCC-00144	A	29296875	732421875	4	2
12	ERCC-00170	A	146484375	366210938	4	2
13	ERCC-00154	A	732421875	183105469	4	2
14	ERCC-00085	A	732421875	183105469	4	2
15	ERCC-00028	A	366210938	0.91552734	4	2
16	ERCC-00033	A	183105469	0.45776367	4	2
17	ERCC-00134	A	183105469	0.45776367	4	2
18	ERCC-00147	A	0.91552734	0.22888184	4	2
19	ERCC-00097	A	0.45776367	0.11444092	4	2
20	ERCC-00156	A	0.45776367	0.11444092	4	2
21	ERCC-00123	A	0.22888184	0.05722046	4	2
22	ERCC-00017	A	0.11444092	0.02861023	4	2
23	ERCC-00083	A	0.02861023	0.00715256	4	2
24	ERCC-00096	B	15000	15000	1	0
25	ERCC-00171	B	3750	3750	1	0
26	ERCC-00009	B	937.5	937.5	1	0
27	ERCC-00042	B	468.75	468.75	1	0
28	ERCC-00060	B	234375	234375	1	0
29	ERCC-00035	B	1171875	1171875	1	0
30	ERCC-00025	B	5859375	5859375	1	0
31	ERCC-00051	B	5859375	5859375	1	0
32	ERCC-00053	B	29296875	29296875	1	0
33	ERCC-00148	B	146484375	146484375	1	0
34	ERCC-00126	B	146484375	146484375	1	0
35	ERCC-00034	B	732421875	732421875	1	0
36	ERCC-00150	B	366210938	366210938	1	0
37	ERCC-00067	B	366210938	366210938	1	0
38	ERCC-00031	B	183105469	183105469	1	0
39	ERCC-00109	B	0.91552734	0.91552734	1	0
40	ERCC-00073	B	0.91552734	0.91552734	1	0
41	ERCC-00158	B	0.45776367	0.45776367	1	0
42	ERCC-00104	B	0.22888184	0.22888184	1	0
43	ERCC-00142	B	0.22888184	0.22888184	1	0
44	ERCC-00138	B	0.11444092	0.11444092	1	0
45	ERCC-00117	B	0.05722046	0.05722046	1	0
46	ERCC-00075	B	0.01430512	0.01430512	1	0
47	ERCC-00074	C	15000	22500	0.67	-0.58
48	ERCC-00113	C	3750	5625	0.67	-0.58
49	ERCC-00145	C	937.5	1406.25	0.67	-0.58
50	ERCC-00111	C	468.75	703125	0.67	-0.58
51	ERCC-00076	C	234375	3515625	0.67	-0.58
52	ERCC-00044	C	1171875	17578125	0.67	-0.58
53	ERCC-00162	C	5859375	87890625	0.67	-0.58
54	ERCC-00071	C	5859375	87890625	0.67	-0.58
55	ERCC-00084	C	29296875	439453125	0.67	-0.58
56	ERCC-00099	C	146484375	219726563	0.67	-0.58
57	ERCC-00054	C	146484375	219726563	0.67	-0.58
58	ERCC-00157	C	732421875	109863281	0.67	-0.58
59	ERCC-00143	C	366210938	549316406	0.67	-0.58
60	ERCC-00039	C	366210938	549316406	0.67	-0.58
61	ERCC-00058	C	183105469	274658203	0.67	-0.58
62	ERCC-00120	C	0.91552734	137329102	0.67	-0.58
63	ERCC-00040	C	0.91552734	137329102	0.67	-0.58
64	ERCC-00164	C	0.45776367	0.68664551	0.67	-0.58
65	ERCC-00024	C	0.22888184	0.34332275	0.67	-0.58
66	ERCC-00016	C	0.22888184	0.34332275	0.67	-0.58
67	ERCC-00012	C	0.11444092	0.17166138	0.67	-0.58
68	ERCC-00098	C	0.05722046	0.08583069	0.67	-0.58
69	ERCC-00057	C	0.01430512	0.02145767	0.67	-0.58
70	ERCC-00002	D	15000	30000	0.5	-1
71	ERCC-00046	D	3750	7500	0.5	-1
72	ERCC-00003	D	937.5	1875	0.5	-1
73	ERCC-00043	D	468.75	937.5	0.5	-1
74	ERCC-00022	D	234375	468.75	0.5	-1
75	ERCC-00112	D	1171875	234375	0.5	-1
76	ERCC-00165	D	5859375	1171875	0.5	-1
77	ERCC-00079	D	5859375	1171875	0.5	-1
78	ERCC-00078	D	29296875	5859375	0.5	-1
79	ERCC-00163	D	146484375	29296875	0.5	-1
80	ERCC-00059	D	146484375	29296875	0.5	-1
81	ERCC-00160	D	732421875	146484375	0.5	-1
82	ERCC-00014	D	366210938	732421875	0.5	-1
83	ERCC-00077	D	366210938	732421875	0.5	-1
84	ERCC-00069	D	183105469	366210938	0.5	-1
85	ERCC-00137	D	0.91552734	183105469	0.5	-1
86	ERCC-00013	D	0.91552734	183105469	0.5	-1
87	ERCC-00168	D	0.45776367	0.91552734	0.5	-1
88	ERCC-00041	D	0.22888184	0.45776367	0.5	-1
89	ERCC-00081	D	0.22888184	0.45776367	0.5	-1
90	ERCC-00086	D	0.11444092	0.22888184	0.5	-1
91	ERCC-00061	D	0.05722046	0.11444092	0.5	-1
92	ERCC-00048	D	0.01430512	0.02861023	0.5	-1
